# Supplementary material
Source: publisher figshare collection journal article supplement (https://tandf.figshare.com/ndownloader/files/22279698)
Supplement: Supplementary file 1 [file 22279698]

## Sheet: Tabelle1
Comparison	P-Value
	cg25683810 (1)	cg07930752 (2)	cg10240150 (3)	cg13651908 (4)	cg04098585 (5)	cg02099418 (6)	cg22309950 (7)	cg13790288 (8)	cg21911000 (9)	cg24336674 (10)	cg09861034 (11)	cg01206398 (12)	cg23012700 (13)	cg09345839 (14)	cg12005412 (15)	cg22572158 (16)	cg05092371 (17)	cg24077172 (18)	cg05074138 (19)	cg08460026 (20)	cg26091609 (21)	cg14288266 (22)	cg18914852 (23)	cg18219180 (24)	cg00372692 (25)	cg21423458 (26)	cg15344028 (27)	cg18561976 (28)	cg15247069 (29)	cg17751550 (30)	cg21139795 (31)	cg06045968 (32)	cg13458803 (33)	cg21572897 (34)	cg13913728 (35)	cg02470871 (36)	cg12978275 (37)	cg06300880 (38)	cg11874272 (39)	cg01878435 (40)	cg04387658 (41)	cg00697440 (42)	cg06327732 (43)	cg09644952 (44)	cg13069531 (45)	cg01436254 (46)	cg16331599 (47)	cg13617155 (48)	cg12323361 (49)
All	<0.001	<0.001	<0.001	<0.001	<0.001	<0.001	0.057	0.37	<0.001	<0.001	0.20	<0.001	<0.001	<0.001	<0.001	0.001	<0.001	0.59	<0.001	<0.001	<0.001	<0.001	<0.001	<0.001	<0.001	<0.001	<0.001	<0.001	<0.001	<0.001	<0.001	<0.001	<0.001	<0.001	<0.001	<0.001	<0.001	<0.001	<0.001	0.45	<0.001	<0.001	<0.001	<0.001	<0.001	<0.001	<0.001	<0.001	<0.001
HPV+ vs. HPV-	1.0	1.0	0.56	0.89	1.0	1.0	N.A.	N.A.	1.0	0.16	1.0	0.38	1.0	1.0	0.28	1.0	1.0	N.A.	1.0	1.0	1.0	1.0	0.85	0.26	1.0	1.0	1.0	1.0	1.0	1.0	1.0	1.0	0.003	0.55	0.24	1.0	1.0	1.0	1.0	N.A.	1.0	1.0	1.0	0.12	1.0	0.26	0.001	0.19	1.0
HPV+ vs. Monocytes	0.043	0.085	1.0	1.0	<0.001	<0.001	N.A.	N.A.	<0.001	0.15	1.0	1.0	<0.001	<0.001	1.0	1.0	0.011	N.A.	1.0	1.0	<0.001	0.044	0.001	1.0	1.0	0.052	<0.001	<0.001	<0.001	0.007	<0.001	<0.001	0.002	<0.001	1.0	<0.001	0.25	<0.001	0.008	N.A.	<0.001	<0.001	1.0	1.0	<0.001	<0.001	<0.001	<0.001	0.001
HPV+ vs. CD8+ T Cells	1.0	<0.001	<0.001	<0.001	<0.001	<0.001	N.A.	N.A.	<0.001	1.0	1.0	1.0	<0.001	<0.001	1.0	1.0	0.008	N.A.	<0.001	<0.001	0.15	0.047	<0.001	1.0	1.0	0.72	<0.001	<0.001	<0.001	0.012	1.0	<0.001	1.0	<0.001	1.0	0.01	0.60	<0.001	<0.001	N.A.	0.66	0.041	1.0	0.003	<0.001	<0.001	<0.001	<0.001	0.004
HPV+ vs. CD4+ T Cells	1.0	<0.001	<0.001	<0.001	<0.001	<0.001	N.A.	N.A.	<0.001	<0.001	1.0	1.0	<0.001	<0.001	1.0	1.0	0.045	N.A.	<0.001	<0.001	1.0	0.066	<0.001	0.007	0.001	1.0	<0.001	<0.001	<0.001	0.03	1.0	<0.001	0.183	<0.001	1.0	0.011	1	<0.001	<0.001	N.A.	0.41	<0.001	1.0	0.059	<0.001	<0.001	<0.001	<0.001	0.006
HPV+ vs B Cells	1.0	0.047	1.0	1.0	<0.001	<0.001	N.A.	N.A.	<0.001	1.0	1.0	1.0	0.001	<0.001	1.0	1.0	0.017	N.A.	1.0	<0.001	<0.001	0.007	<0.001	1.0	1.0	0.17	<0.001	<0.001	<0.001	0.024	0.01	<0.001	1.0	0.028	1.0	0.001	0.012	0.11	1.0	N.A.	<0.001	0.001	1.0	<0.001	<0.001	<0.001	<0.001	<0.001	0.86
HPV+ vs. Granulocytes	1.0	0.021	1.0	1.0	<0.001	<0.001	N.A.	N.A.	<0.001	0.12	0.58	1.0	<0.001	<0.001	1.0	1.0	0.035	N.A.	1.0	1.0	<0.001	1.0	<0.001	1.0	1.0	0.012	<0.001	<0.001	<0.001	0.006	<0.001	<0.001	<0.001	<0.001	1.0	<0.001	0.46	<0.001	<0.001	N.A.	<0.001	<0.001	1.0	1.0	<0.001	<0.001	<0.001	<0.001	0.002
HPV- vs. Monocytes	<0.001	0.009	1.0	0.001	<0.001	<0.001	N.A.	N.A.	<0.001	1.0	1.0	<0.001	<0.001	<0.001	<0.001	0.028	<0.001	N.A.	0.003	1.0	<0.001	<0.001	0.001	1.0	<0.001	<0.001	<0.001	<0.001	<0.001	<0.001	<0.001	<0.001	1.0	<0.001	<0.001	<0.001	<0.001	<0.001	<0.001	N.A.	<0.001	<0.001	0.013	<0.001	<0.001	<0.001	<0.001	<0.001	<0.001
HPV- vs. CD8+ T Cells	1.0	<0.001	<0.001	<0.001	<0.001	<0.001	N.A.	N.A.	<0.001	<0.001	1.0	<0.001	<0.001	<0.001	0.27	0.005	<0.001	N.A.	<0.001	<0.001	<0.001	<0.001	<0.001	0.099	0.002	0.001	<0.001	<0.001	<0.001	<0.001	1.0	<0.001	<0.001	<0.001	<0.001	0.008	<0.001	<0.001	<0.001	N.A.	1.0	<0.001	1.0	0.65	<0.001	<0.001	<0.001	<0.001	<0.001
HPV- vs. CD4+ T Cells	1.0	<0.001	<0.001	<0.001	<0.001	<0.001	N.A.	N.A.	<0.001	<0.001	1.0	<0.001	<0.001	<0.001	0.50	1.0	<0.001	N.A.	<0.001	<0.001	1.0	<0.001	<0.001	0.61	<0.001	1.0	<0.001	<0.001	<0.001	<0.001	1.0	<0.001	<0.001	<0.001	<0.001	0.01	0.001	<0.001	<0.001	N.A.	1.0	<0.001	1.0	1.0	<0.001	<0.001	<0.001	<0.001	<0.001
HPV- vs. B Cells	0.13	0.002	0.16	<0.001	<0.001	<0.001	N.A.	N.A.	<0.001	0.081	1.0	<0.001	<0.001	<0.001	<0.001	0.009	<0.001	N.A.	0.003	<0.001	<0.001	<0.001	<0.001	0.55	0.001	<0.001	<0.001	<0.001	<0.001	<0.001	0.003	<0.001	<0.001	0.97	<0.001	<0.001	<0.001	0.011	0.59	N.A.	<0.001	<0.001	1.0	<0.001	<0.001	<0.001	<0.001	<0.001	<0.001
HPV- vs. Granulocytes	1.0	<0.001	1.0	0.003	<0.001	<0.001	N.A.	N.A.	<0.001	1.0	1.0	<0.001	<0.001	<0.001	<0.001	0.014	<0.001	N.A.	0.003	1.0	<0.001	<0.001	<0.001	0.33	<0.001	<0.001	<0.001	<0.001	<0.001	<0.001	<0.001	<0.001	1.0	<0.001	<0.001	<0.001	<0.001	<0.001	<0.001	N.A.	<0.001	<0.001	0.013	<0.001	<0.001	<0.001	<0.001	<0.001	<0.001
Monocytes vs. CD8+ T Cells	0.048	<0.001	<0.001	<0.001	1.0	1.0	N.A.	N.A.	0.99	<0.001	1.0	1.0	1.0	1.0	0.001	1.0	1.0	N.A.	<0.001	<0.001	<0.001	1.0	1.0	1.0	1.0	1.0	<0.001	<0.001	1.0	1.0	<0.001	<0.001	<0.001	0.012	1.0	0.001	1.0	1.0	1.0	N.A.	<0.001	<0.001	0.006	<0.001	<0.001	1.0	1.0	<0.001	1.0
Monocytes vs. CD4+ T Cells	0.001	<0.001	<0.001	<0.001	1.0	1.0	N.A.	N.A.	0.19	<0.001	1.0	1.0	1.0	1.0	0.001	1.0	1.0	N.A.	<0.001	<0.001	<0.001	1.0	1.0	0.007	<0.001	<0.001	<0.001	<0.001	1.0	1.0	<0.001	<0.001	<0.001	0.032	1.0	0.001	1.0	1.0	1.0	N.A.	<0.001	0.001	1.0	<0.001	<0.001	1.0	1.0	<0.001	1.0
Monocytes vs. B Cells	0.78	1.0	1.0	1.0	1.0	1.0	N.A.	N.A.	0.23	0.083	1.0	1.0	1.0	1.0	1.0	1.0	1.0	N.A.	1.0	<0.001	1.0	1.0	1.0	1.0	1.0	1.0	0.75	1.0	1.0	1.0	<0.001	<0.001	<0.001	<0.001	1.0	0.072	<0.001	<0.001	<0.001	N.A.	<0.001	<0.001	0.002	<0.001	1.0	0.031	1.0	1.0	0.002
Monocytes vs. Granulocytes	0.028	1.0	1.0	1.0	1.0	1.0	N.A.	N.A.	1.0	1.0	0.62	1.0	1.0	0.99	1.0	1.0	1.0	N.A.	1.0	1.0	1.0	0.60	1.0	1.0	1.0	1.0	1.0	1.0	1.0	1.0	1.0	0.011	1.0	1.0	1.0	1.0	1.0	1.0	0.013	N.A.	<0.001	1.0	1.0	1.0	1.0	1.0	1.0	1.0	1.0
CD8+ T Cells vs. CD4 T+ Cells	1.0	<0.001	<0.001	<0.001	1.0	1.0	N.A.	N.A.	1.0	<0.001	1.0	1.0	1.0	1.0	1.0	0.98	1.0	N.A.	<0.001	1.0	<0.001	1.0	1.0	<0.001	<0.001	<0.001	1.0	1.0	1.0	1.0	1.0	1.0	0.30	1.0	1.0	1.0	1.0	1.0	1.0	N.A.	1.0	0.003	0.62	1.0	1.0	1.0	1.0	1.0	1.0
CD8+ T Cells vs. B Cells	1.0	<0.001	<0.001	<0.001	1.0	1.0	N.A.	N.A.	<0.001	<0.001	1.0	1.0	1.0	1.0	0.003	1.0	1.0	N.A.	<0.001	<0.001	0.002	1.0	1.0	1.0	1.0	1.0	<0.001	<0.001	1.0	1.0	0.005	1.0	0.14	<0.001	1.0	1.0	<0.001	<0.001	<0.001	N.A.	<0.001	0.74	1.0	<0.001	<0.001	<0.001	1.0	<0.001	0.032
CD8+ T Cells vs. Granulocytes	1.0	<0.001	<0.001	<0.001	1.0	1.0	N.A.	N.A.	1.0	<0.001	0.98	1.0	1.0	0.44	0.002	1.0	1.0	N.A.	<0.001	<0.001	<0.001	0.65	1.0	1.0	1.0	0.29	<0.001	<0.001	1.0	1.0	<0.001	0.11	<0.001	0.32	1.0	<0.001	1.0	1.0	1.0	N.A.	<0.001	<0.001	0.005	<0.001	<0.001	1.0	1.0	<0.001	1.0
CD4+ T Cells vs. B Cells	0.77	<0.001	<0.001	<0.001	1.0	1.0	N.A.	N.A.	<0.001	<0.001	1.0	1.0	1.0	1.0	0.002	1.0	1.0	N.A.	<0.001	<0.001	<0.001	1.0	1.0	0.001	<0.001	<0.001	<0.001	<0.001	1.0	1.0	0.006	0.11	<0.001	<0.001	1.0	1.0	<0.001	0.001	<0.001	N.A.	<0.001	1.0	0.30	<0.001	<0.001	<0.001	1.0	<0.001	0.066
CD4+ T Cells vs. Granulocytes	1.0	<0.001	<0.001	<0.001	1.0	1.0	N.A.	N.A.	0.95	<0.001	1.0	1.0	1.0	1.0	0.001	1.0	1.0	N.A.	<0.001	<0.001	<0.001	1.0	1.0	<0.001	<0.001	<0.001	<0.001	<0.001	1.0	1.0	<0.001	1.0	<0.001	0.68	1.0	<0.001	1.0	1.0	1.0	N.A.	<0.001	0.002	1.0	0.001	<0.001	1.0	1.0	<0.001	1.0
B Cells vs. Granulocytes	1.0	1.0	1.0	1.0	1.0	1.0	N.A.	N.A.	0.037	0.06	1.0	1.0	1.0	1.0	1.0	1.0	1.0	N.A.	1.0	<0.001	1.0	0.038	1.0	1.0	1.0	1.0	1.0	1.0	1.0	1.0	<0.001	<0.001	<0.001	<0.001	1.0	0.050	<0.001	<0.001	<0.001	N.A.	1.0	<0.001	0.002	<0.001	1.0	<0.001	1.0	1.0	0.012
[truncated: 2 more columns]
